# Supplementary material
Source: Springer Nature journal article supplement (https://www.springermedizin.de/resource/supplementary/12887_2013_987_MOESM1_ESM.pdf/9476868)

**A**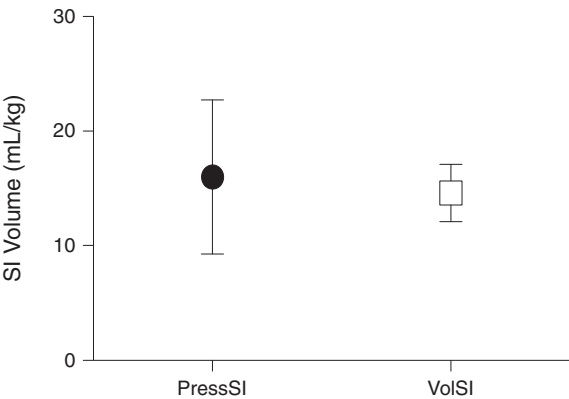**B**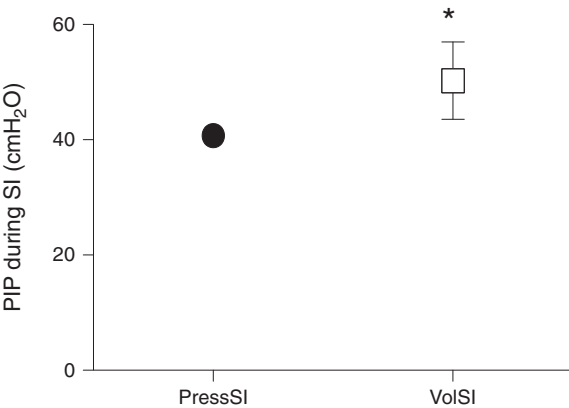

Supplement: MOESM1 [file 9476868]
